# Supplementary material for: PMAK: Enhancing kcat Prediction through Residue-Aware Attention Mechanism and Pre-Trained Representations
Source: Research Square preprint supplement (doi:10.21203/rs.3.rs-6650408/v1), 2025-05-22
Supplement: Supplementary file 1 [file d91eb3113e78129ceb9f849f.docx]

**Supplementary Tables**

**Supplementary Table S1.** Proportion of test set samples with high enzyme similarity (99–100%) to those in the training set for the first category of methods, which utilize only enzyme and single-substrate information.

| Methods | Total number of samples | Number of high-similarity samples (99-100%) | Proportion |
| --- | --- | --- | --- |
| DLKcat | 1684 | 1536 | 91.2% |
| UniKP | 1684 | 1536 | 91.2% |
| DLTKcat | 2164 | 2014 | 93.1% |
| DeepEnzyme | 1193 | 1114 | 93.4% |

**Supplementary Figures**


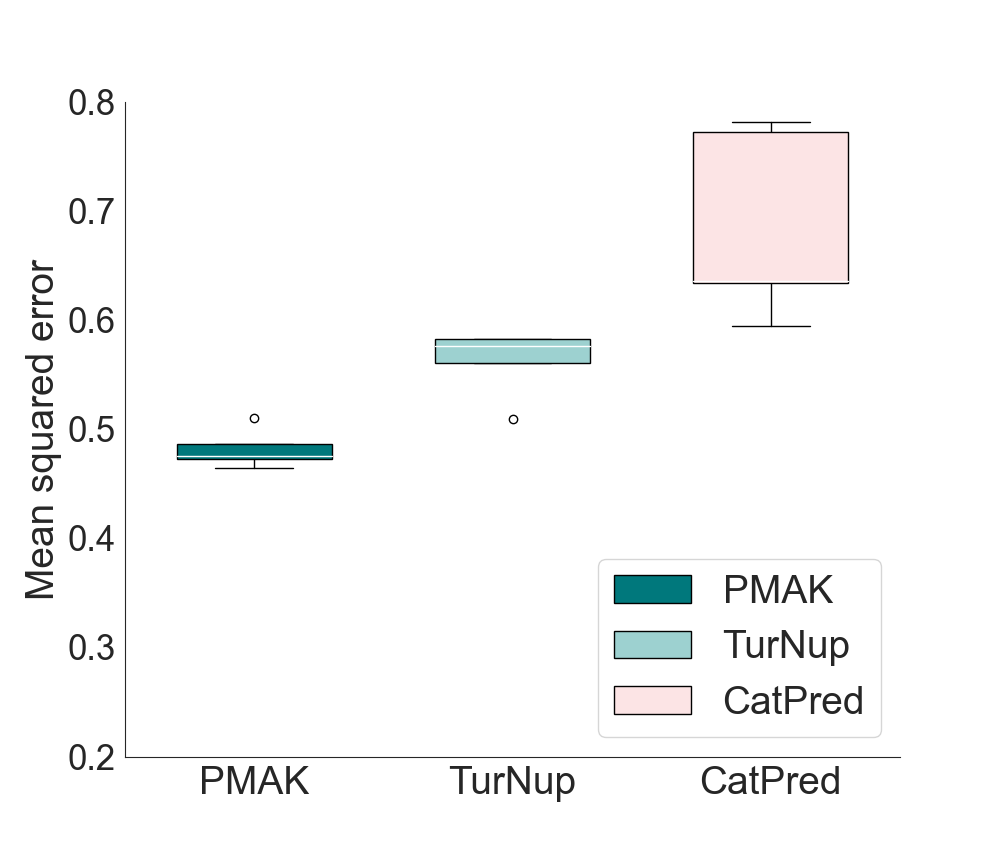


**Supplementary Figure S1.** Comparison of MSE between PMAK, TurNup and CatPred on the test sets, generated through five random splits under warm-start conditions.


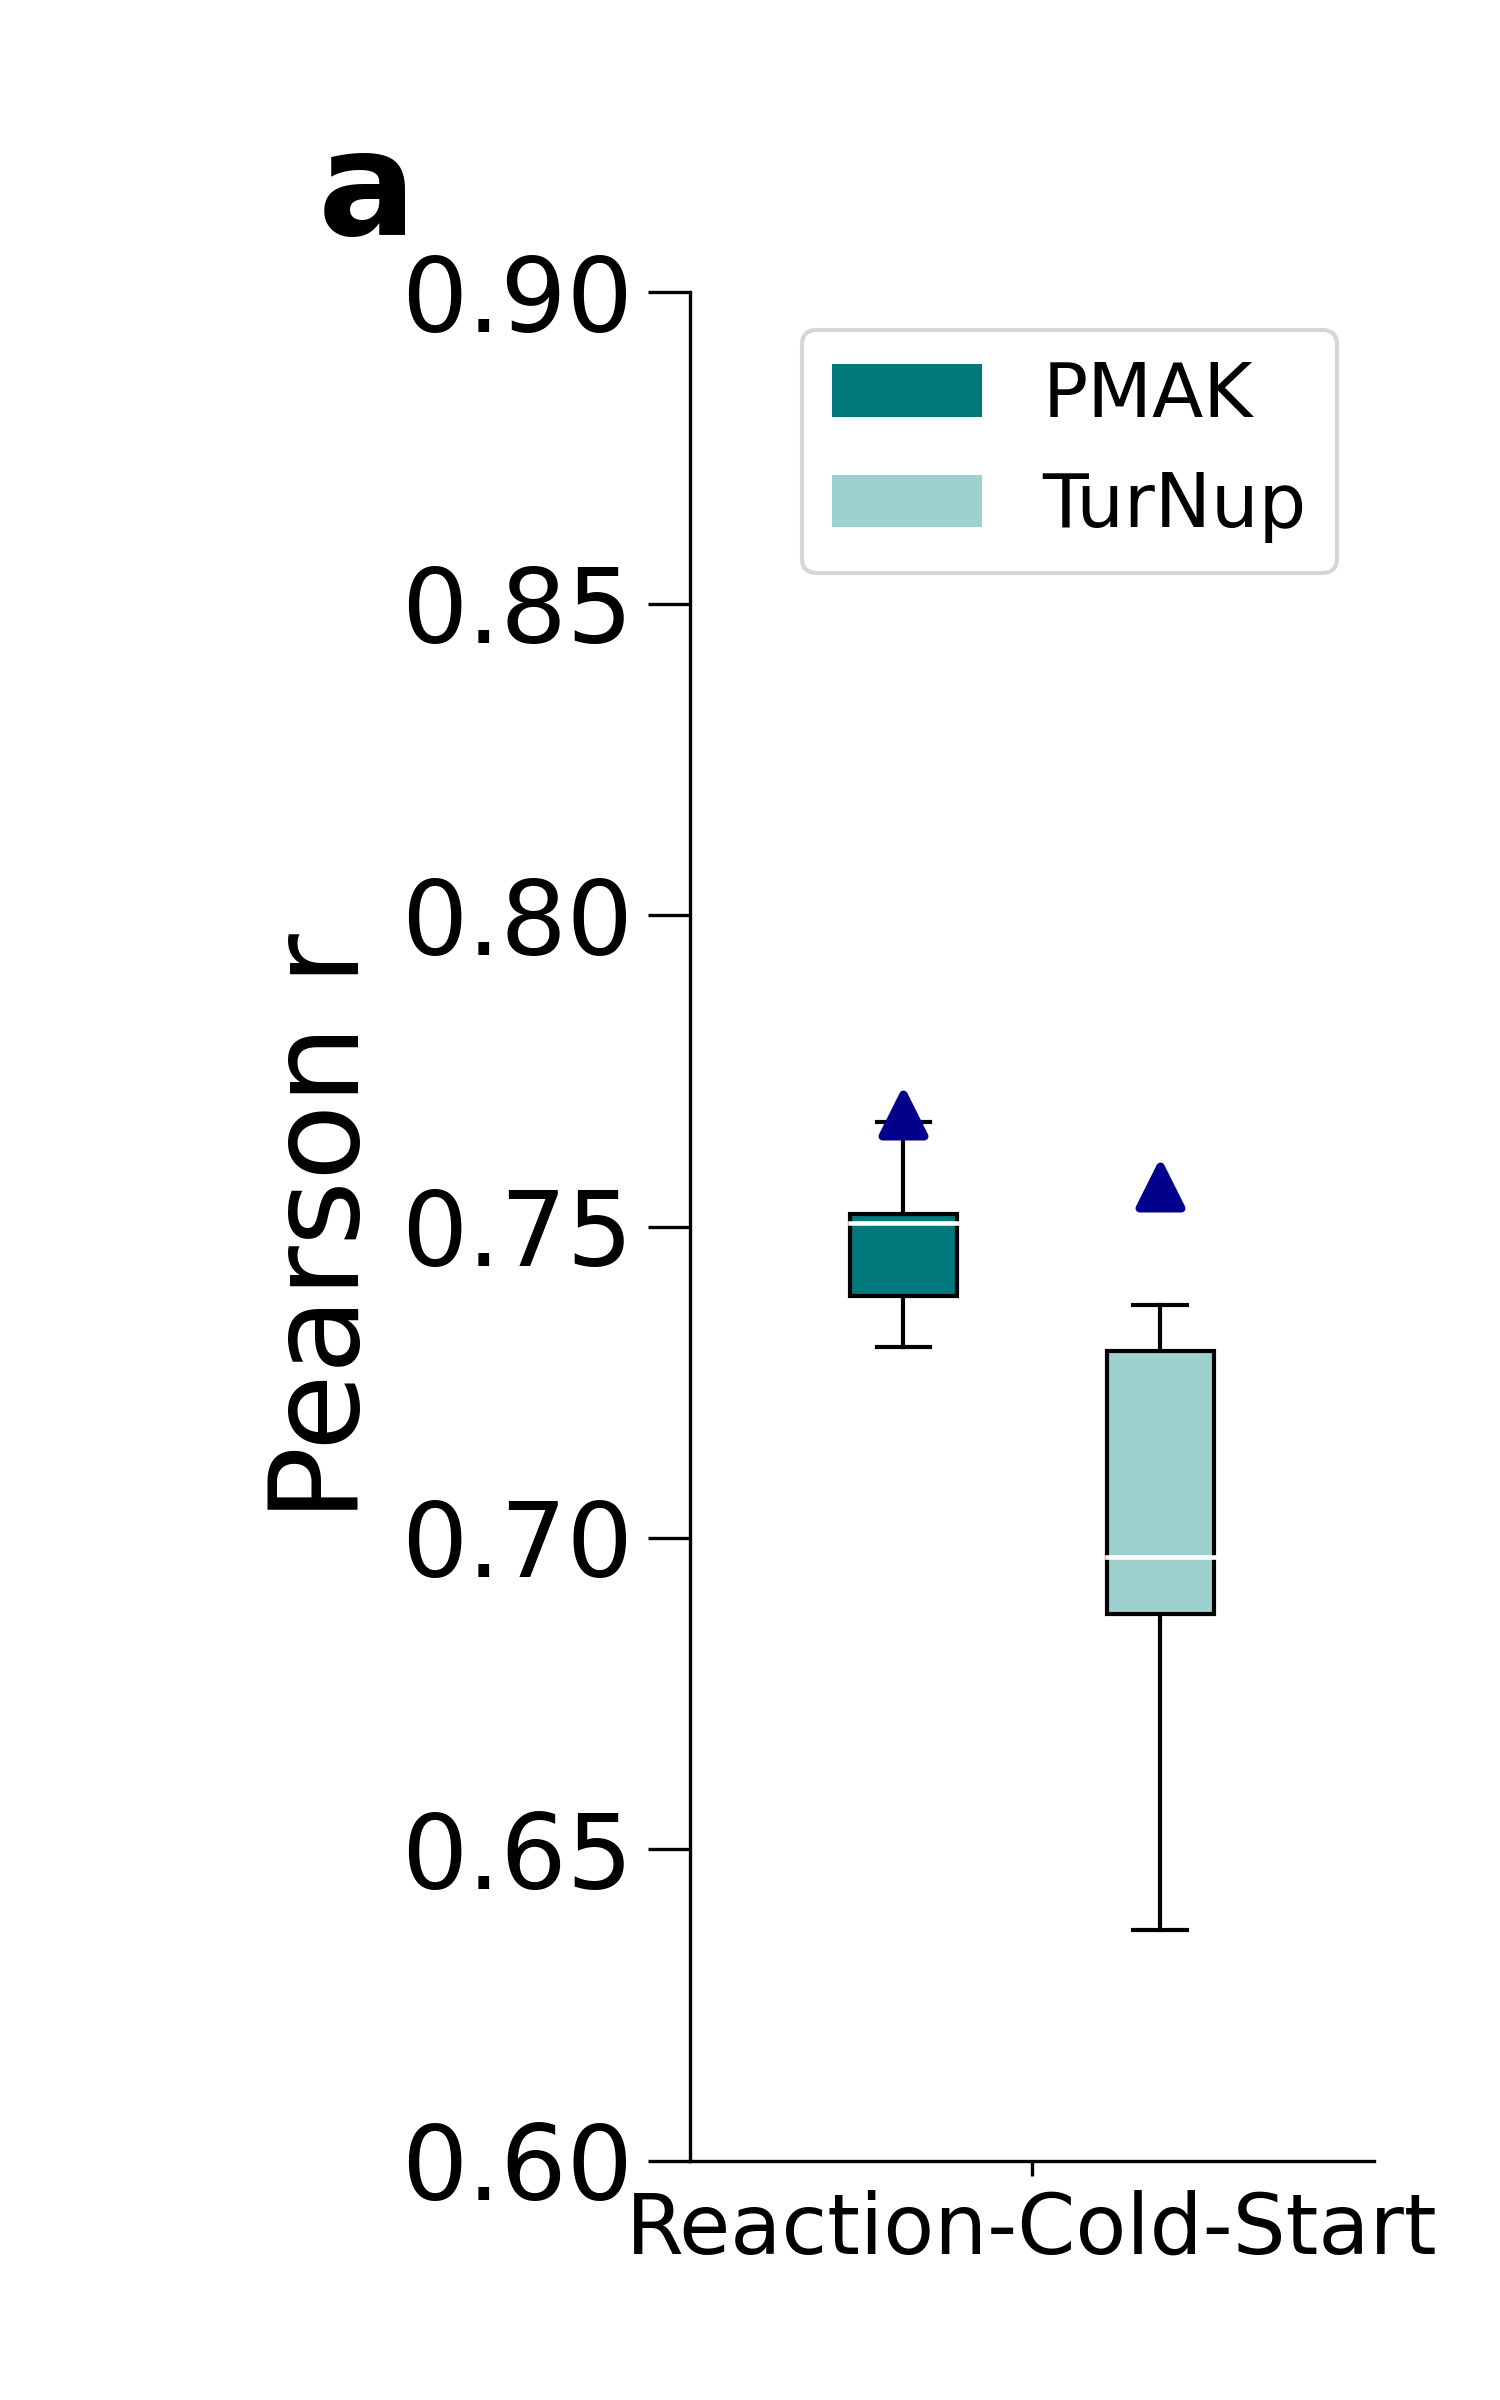

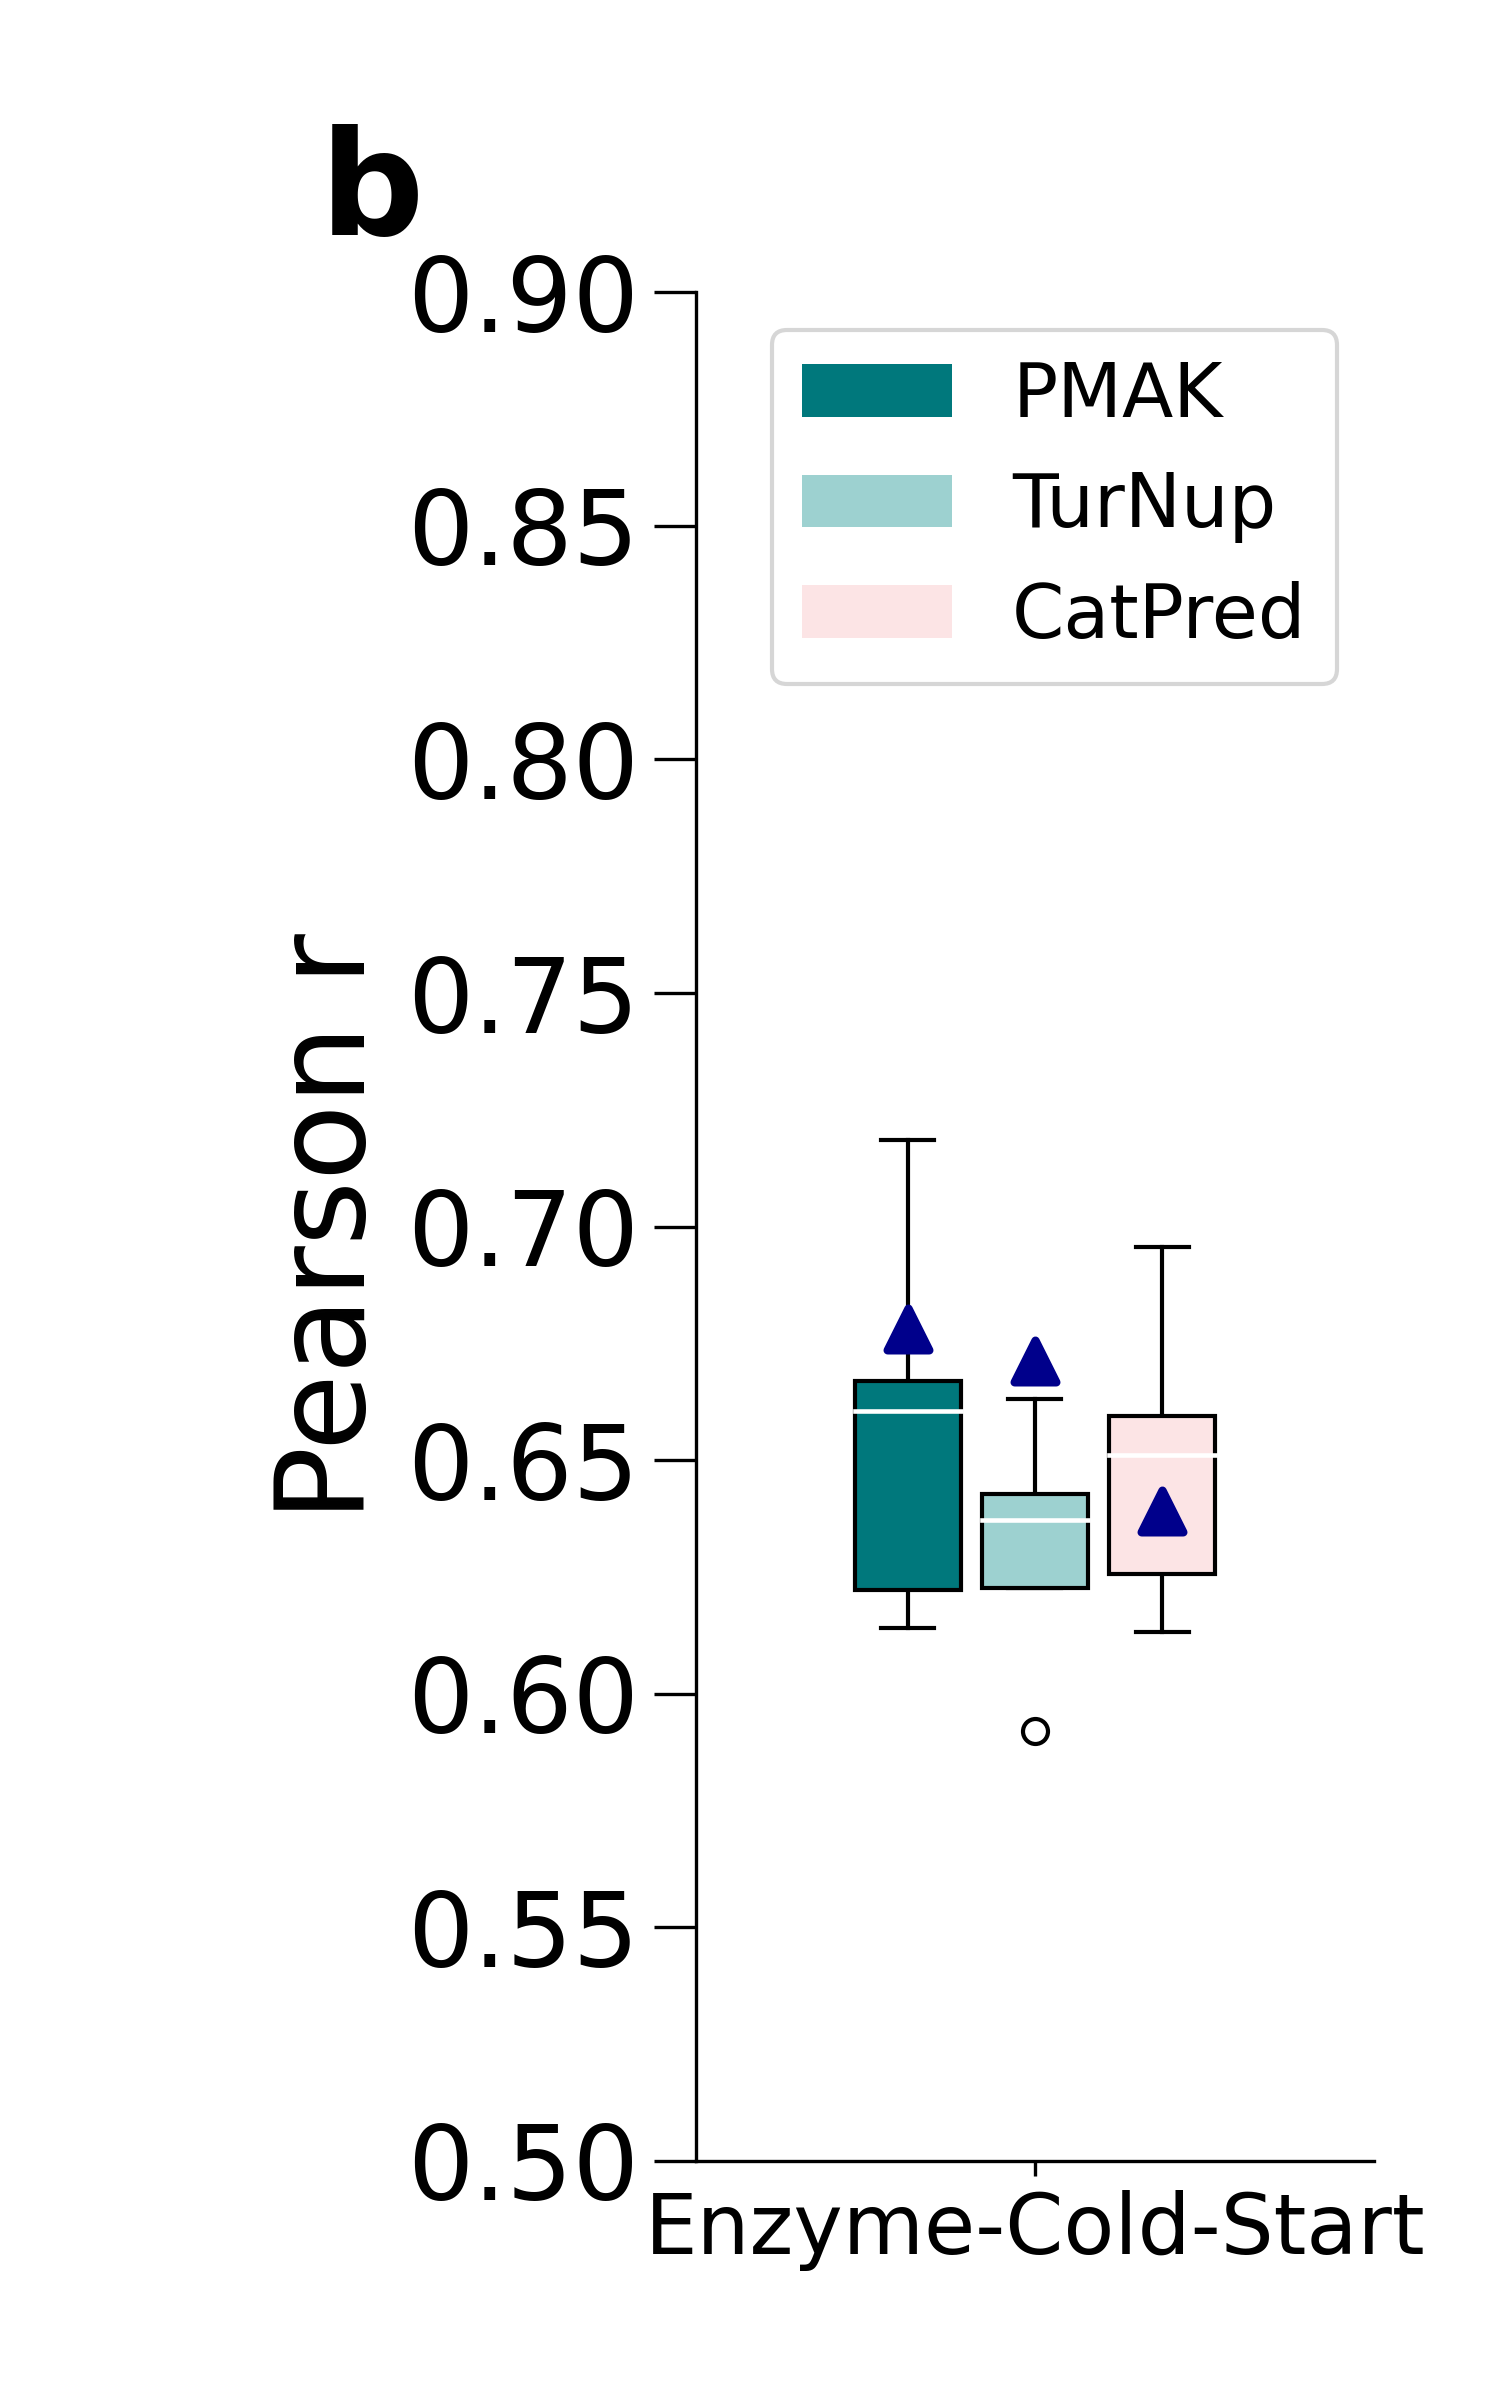


**Supplementary Figure S2. a.** Comparison of Pearson Correlation Coefficient (PCC) for PMAK and TurNup on the test set under the cold-start experiments for reactions. **b.** Comparison of Pearson Correlation Coefficient (PCC) for PMAK, TurNup and CatPred on the test set under the cold-start experiments for enzymes.
